# Supplementary material
Source: PubMed Central journal article supplement (PMC4417613)
Supplement: NIHMS667557-supplement-Supplementary_Figure_2.pdf [file NIHMS667557-supplement-Supplementary_Figure_2.pdf]

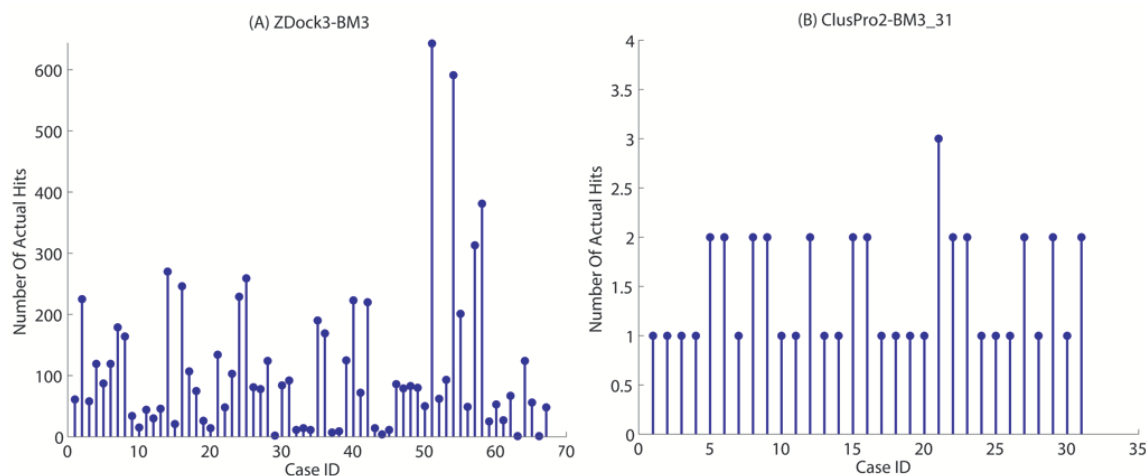

**Figure S2. The distribution of the total number of hits in each docking case of the ZDock3-BM3 decoy set and the ClusPro2-BM3\_31 decoy set.** A) ZDock3-BM3 decoy set. A hit is defined as a near-native conformation with  $I\text{-}RMSE \leq 2.5 \text{ \AA}$ . For each docking case, 54,000 docked conformations are generated by ZDock 3.0 docking program. Studied here are 67 cases for which ZDock 3.0 is able to generate at least one hit and for which PS-HomPPI, the interface residue predictor used by our ranking method DockRank, is able to return interface predictions. B) ClusPro2-BM3\_31 decoy set. A hit is defined as a near-native conformation with  $L\text{-}RMSE \leq 10 \text{ \AA}$ . For each docking case, about 30 docked conformations are returned by ClusPro 2.0 docking program. Studied here are 31 cases for which ClusPro 2.0 is able to generate at least one hit and for which PS-HomPPI is able to return interface predictions.
