# Supplementary material
Source: PubMed Central journal article supplement (PMC4417613)
Supplement: NIHMS667557-supplement-Supplementary_Figure_5.pdf [file NIHMS667557-supplement-Supplementary_Figure_5.pdf]

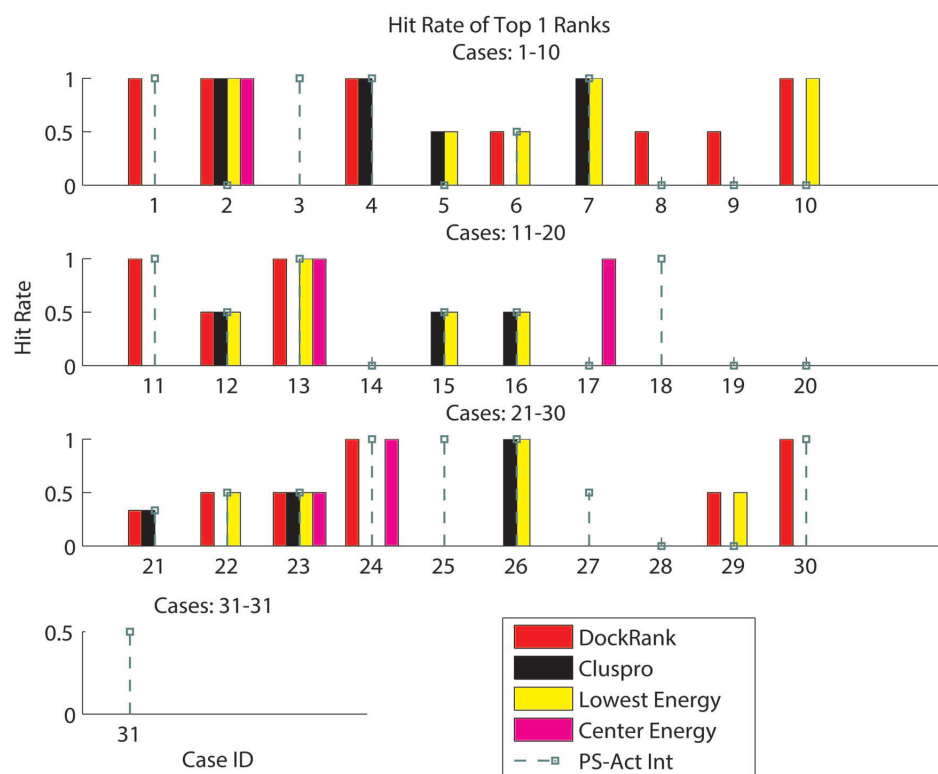

|                         | PS-Act Int | DockRank | ClusPro | Lowest Energy | Center Energy |
|-------------------------|------------|----------|---------|---------------|---------------|
| <b>Average Hit Rate</b> | 0.49       | 0.38     | 0.22    | 0.29          | 0.15          |

**Figure S5. Hit Rates in top docked conformations ranked by DockRank and ClusPro scoring functions on the ClusPro2-BM3\_31 decoy set.** The average Hit Rates of scoring functions over all cases are shown in the table. The Hit Rates of DockRank’s scoring function supplied with actual partner-specific interface residues (labeled as “PS-Act Int”, stems) are plotted to define the upper bound of the performance of DockRank’s scoring function.
