# Supplementary material
Source: PubMed Central journal article supplement (PMC4417613)
Supplement: NIHMS667557-supplement-Supplementary_Figure_7.pdf [file NIHMS667557-supplement-Supplementary_Figure_7.pdf]

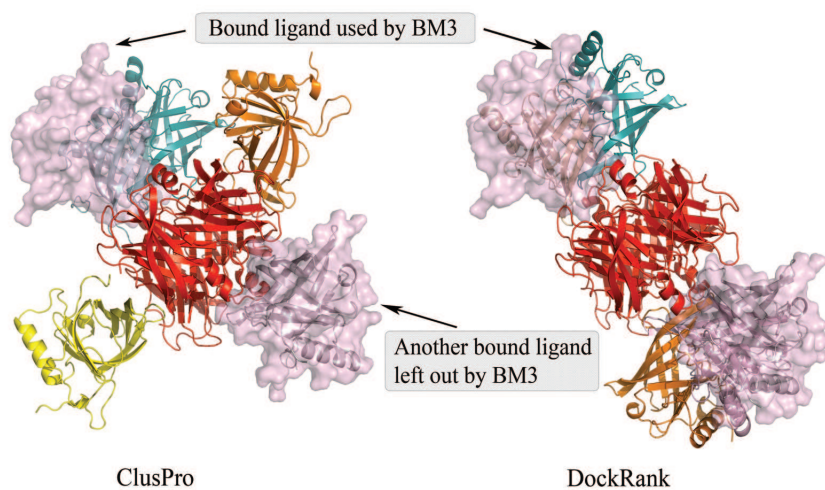

**Figure S7. The top 5 conformations ranked by DockRank and ClusPro for docking case 1RLB.** Both ligands of the bound complex downloaded from PDB are shown in pink surface representation. Figure generated using PYMOL [70].
