# Supplementary material
Source: PubMed Central journal article supplement (PMC4417613)
Supplement: NIHMS667557-supplement-Supplementary_Table_1.pdf [file NIHMS667557-supplement-Supplementary_Table_1.pdf]

**Table S1. 67 docking cases of the ZDock3-BM3 decoy set used in this study.** For each case, i) ZDock 3.0 generated at least one near-native structure among a total of 54,000 decoys and ii) PS-HomPPI is able to generate interface predictions.

| Case ID | Bound Complex PDB ID | Case ID | Bound Complex PDB ID | Case ID | Bound Complex PDB ID |
|---------|----------------------|---------|----------------------|---------|----------------------|
| 1       | 2HLE                 | 31      | 1DFJ                 | 61      | 1KTZ                 |
| 2       | 1MAH                 | 32      | 1AK4                 | 62      | 1KXQ                 |
| 3       | 1B6C                 | 33      | 2HRK                 | 63      | 1NW9                 |
| 4       | 1JPS                 | 34      | 1GCQ                 | 64      | 1EAW                 |
| 5       | 1HE1                 | 35      | 1IQD                 | 65      | 1EZU                 |
| 6       | 2QFW                 | 36      | 1ML0                 | 66      | 1OPH                 |
| 7       | 1AVX                 | 37      | 2AJF                 | 67      | 1GRN                 |
| 8       | 1XD3                 | 38      | 1SBB                 |         |                      |
| 9       | 1DQJ                 | 39      | 2MTA                 |         |                      |
| 10      | 1QA9                 | 40      | 1ZHI                 |         |                      |
| 11      | 1CGI                 | 41      | 1Z5Y                 |         |                      |
| 12      | 1KAC                 | 42      | 1MLC                 |         |                      |
| 13      | 1GPW                 | 43      | 1KLU                 |         |                      |
| 14      | 1AZS                 | 44      | 2NZ8                 |         |                      |
| 15      | 1GP2                 | 45      | 1GLA                 |         |                      |
| 16      | 2I25                 | 46      | 2SNI                 |         |                      |
| 17      | 1AHW                 | 47      | 1AKJ                 |         |                      |
| 18      | 1NCA                 | 48      | 1T6B                 |         |                      |
| 19      | 1K5D                 | 49      | 1BVK                 |         |                      |
| 20      | 2PCC                 | 50      | 1S1Q                 |         |                      |
| 21      | 2FD6                 | 51      | 1BJ1                 |         |                      |
| 22      | 1I4D                 | 52      | 1Z0K                 |         |                      |
| 23      | 2CFH                 | 53      | 2B42                 |         |                      |
| 24      | 1YVB                 | 54      | 1PPE                 |         |                      |
| 25      | 2UUY                 | 55      | 1R0R                 |         |                      |
| 26      | 1EWY                 | 56      | 1VFB                 |         |                      |
| 27      | 1AY7                 | 57      | 7CEI                 |         |                      |
| 28      | 1F51                 | 58      | 1RLB                 |         |                      |
| 29      | 1KKL                 | 59      | 1EFN                 |         |                      |
| 30      | 1UDI                 | 60      | 1IJK                 |         |                      |
