# Supplementary material
Source: PubMed Central journal article supplement (PMC4417613)
Supplement: NIHMS667557-supplement-Supplementary_Table_2.pdf [file NIHMS667557-supplement-Supplementary_Table_2.pdf]

**Table S2. ClusPro2-BM3\_31 set.** This set contains 31 docking cases, for which i) ClusPro 2.0 returned at least one near-native conformation (a docked conformation with  $L\text{-}RMSD \leq 10$  Å), and ii) PS-HomPPI is able to generate interface predictions for the unbound component proteins.

| Case ID | Bound Complex PDB ID |
|---------|----------------------|---------|----------------------|---------|----------------------|---------|----------------------|
| 1       | 1MAH                 | 11      | 1F51                 | 21      | 2SNI                 | 31      | 1ACB                 |
| 2       | 1B6C                 | 12      | 1UDI                 | 22      | 2B42                 |         |                      |
| 3       | 1HE1                 | 13      | 1DFJ                 | 23      | 1PPE                 |         |                      |
| 4       | 1AVX                 | 14      | 2HRK                 | 24      | 1R0R                 |         |                      |
| 5       | 1XD3                 | 15      | 1IQD                 | 25      | 1RLB                 |         |                      |
| 6       | 1CGI                 | 16      | 1ML0                 | 26      | 1KXQ                 |         |                      |
| 7       | 1GPW                 | 17      | 1Z5Y                 | 27      | 1HIA                 |         |                      |
| 8       | 2PCC                 | 18      | 1MLC                 | 28      | 1NW9                 |         |                      |
| 9       | 1YVB                 | 19      | 2NZ8                 | 29      | 1EAW                 |         |                      |
| 10      | 1EWY                 | 20      | 1E6J                 | 30      | 1EZU                 |         |                      |
