# Supplementary material
Source: PubMed Central journal article supplement (PMC4417613)
Supplement: NIHMS667557-supplement-Supplementary_Table_3.pdf [file NIHMS667557-supplement-Supplementary_Table_3.pdf]

**Table S3. ClusPro2-BM3\_45 set.** This set contains 45 docking cases, for which i) ClusPro 2.0 returned at least one near-native conformation (a docked conformation with  $L\text{-}RMSD \leq 15$  Å), and ii) PS-HomPPI is able to generate interface predictions for the unbound component proteins.

| Case ID | Bound Complex PDB ID | Case ID | Bound Complex PDB ID | Case ID | Bound Complex PDB ID |
|---------|----------------------|---------|----------------------|---------|----------------------|
| 1       | 1ACB                 | 16      | 1HIA                 | 31      | 1XD3                 |
| 2       | 1AVX                 | 17      | 1IJK                 | 32      | 1YVB                 |
| 3       | 1AY7                 | 18      | 1IQD                 | 33      | 1Z0K                 |
| 4       | 1B6C                 | 19      | 1KKL                 | 34      | 1Z5Y                 |
| 5       | 1BVK                 | 20      | 1KXQ                 | 35      | 1ZHI                 |
| 6       | 1CGI                 | 21      | 1MAH                 | 36      | 2B42                 |
| 7       | 1D6R                 | 22      | 1ML0                 | 37      | 2CFH                 |
| 8       | 1DFJ                 | 23      | 1MLC                 | 38      | 2HLE                 |
| 9       | 1E6J                 | 24      | 1NW9                 | 39      | 2HRK                 |
| 10      | 1EAW                 | 25      | 1OPH                 | 40      | 2MTA                 |
| 11      | 1EWY                 | 26      | 1PPE                 | 41      | 2NZ8                 |
| 12      | 1EZU                 | 27      | 1R0R                 | 42      | 2PCC                 |
| 13      | 1F51                 | 28      | 1R8S                 | 43      | 2SNI                 |
| 14      | 1GPW                 | 29      | 1RLB                 | 44      | 2UUY                 |
| 15      | 1HE1                 | 30      | 1UDI                 | 45      | 7CEI                 |
