# Supplementary material
Source: PubMed Central journal article supplement (PMC4417613)
Supplement: NIHMS667557-supplement-Supplementary_Table_4.pdf [file NIHMS667557-supplement-Supplementary_Table_4.pdf]

**Table S4. The performance of DockRank on superimposed models.** The local identity between proteins A and A' is the percentage of identical residues in the local alignment (Num\_identical\_residues/local\_alignment\_length\*100%). The global identity between proteins A and A' is the mean of the percentage of identical residues in each protein ( $[\text{Num\_identical\_residues}/\text{length}(A) + \text{Num\_identical\_residues}/\text{length}(A')] / 2 * 100\%$ ). Out of all 51 dimer cases, there are: **section A**) 37% (19/51) cases for which all superimposed models are near-native (L-RMSD  $\leq 10$  Å); **section B**) 37% (19/51) cases for which at least one superimposed model is near-native and at least one model is incorrect; and **section C**) 25% (13/51) cases for which none of the superimposed models are near-native. The five bold cases in section C) are cases with reliable interface predictions from PS-HomPPI.

| Case ID                                                                                                                                             | Template PDB ID | Template Rec:Lig | Local Identity |                              | Global                 | Global                 | DockRank Score | L-RMSD |
|-----------------------------------------------------------------------------------------------------------------------------------------------------|-----------------|------------------|----------------|------------------------------|------------------------|------------------------|----------------|--------|
|                                                                                                                                                     |                 |                  | Score AA' (%)  | Local Identity Score BB' (%) | Identity Score AA' (%) | Identity Score BB' (%) |                |        |
| <b>A. Cases with at least one near-native model (L-RMSD <math>\leq 10</math> angstroms) and one incorrect model (L-RMSD <math>&gt; 10</math> Å)</b> |                 |                  |                |                              |                        |                        |                |        |
| 1KAC                                                                                                                                                | 2j12            | A:B              | 39.15          | 100                          | 39.07                  | 97.27                  | 0.206          | 3.00   |
| 1KAC                                                                                                                                                | 2wbw            | A:B              | 39.15          | 100                          | 39.07                  | 96.46                  | 0.059          | 46.76  |
| 1AK4                                                                                                                                                | 1m9x            | F:G              | 100            | 96.32                        | 99.7                   | 92.67                  | 0.162          | 7.34   |
| 1AK4                                                                                                                                                | 1m9x            | B:C              | 100            | 96.32                        | 99.7                   | 92.67                  | 0.162          | 7.45   |
| 1AK4                                                                                                                                                | 1m9x            | A:D              | 100            | 96.32                        | 99.7                   | 92.67                  | 0.149          | 3.39   |
| 1AK4                                                                                                                                                | 4dga            | B:D              | 98.78          | 93.33                        | 98.48                  | 89.13                  | 0.146          | 5.72   |
| 1AK4                                                                                                                                                | 1m9x            | E:H              | 100            | 96.32                        | 99.7                   | 92.67                  | 0.146          | 3.46   |
| 1AK4                                                                                                                                                | 4dga            | A:C              | 98.78          | 93.33                        | 98.48                  | 89.13                  | 0.143          | 3.31   |
| 1AK4                                                                                                                                                | 1m9d            | A:D              | 100            | 94.12                        | 99.7                   | 90.55                  | 0.143          | 3.93   |
| 1AK4                                                                                                                                                | 4dge            | A:C              | 98.17          | 93.33                        | 97.87                  | 89.13                  | 0.141          | 11.60  |
| 1AK4                                                                                                                                                | 1m9d            | B:C              | 100            | 94.12                        | 99.7                   | 90.55                  | 0.136          | 6.65   |
| 1AK4                                                                                                                                                | 1m9x            | A:G              | 100            | 96.32                        | 99.7                   | 92.67                  | 0.070          | 64.97  |
| 1AVX                                                                                                                                                | 3i29            | A:B              | 81.17          | 46.86                        | 81.17                  | 46.19                  | 0.160          | 5.46   |
| 1AVX                                                                                                                                                | 2qyi            | A:B              | 81.17          | 46.29                        | 81.17                  | 46.1                   | 0.157          | 6.40   |
| 1AVX                                                                                                                                                | 2qyi            | C:D              | 81.17          | 46.29                        | 81.17                  | 46.1                   | 0.151          | 6.12   |
| 1AVX                                                                                                                                                | 2qyi            | A:D              | 81.17          | 46.29                        | 81.17                  | 46.1                   | 0.076          | 44.06  |
| 1B6C                                                                                                                                                | 3mdy            | B:A              | 100            | 67.17                        | 99.08                  | 66.27                  | 0.183          | 4.94   |
| 1B6C                                                                                                                                                | 3mdy            | D:C              | 100            | 67.17                        | 99.08                  | 66.27                  | 0.178          | 5.09   |
| 1B6C                                                                                                                                                | 3h9r            | B:A              | 100            | 66.36                        | 99.08                  | 64.55                  | 0.172          | 2.51   |
| 1B6C                                                                                                                                                | 3mdy            | D:A              | 100            | 67.17                        | 99.08                  | 66.27                  | 0.086          | 69.38  |
| 1B6C                                                                                                                                                | 3mdy            | B:C              | 100            | 67.17                        | 99.08                  | 66.27                  | 0.086          | 69.59  |
| 1EAW                                                                                                                                                | 4dg4            | D:F              | 41.18          | 100                          | 42.21                  | 100                    | 0.229          | 2.07   |
| 1EAW                                                                                                                                                | 4dg4            | B:C              | 41.18          | 100                          | 42.21                  | 100                    | 0.229          | 2.25   |
| 1EAW                                                                                                                                                | 4dg4            | A:E              | 41.18          | 100                          | 42.21                  | 100                    | 0.229          | 2.12   |
| 1EAW                                                                                                                                                | 4dg4            | G:H              | 41.18          | 100                          | 42.21                  | 100                    | 0.229          | 2.23   |
| 1EAW                                                                                                                                                | 3fp6            | E:I              | 39.92          | 100                          | 41.01                  | 100                    | 0.229          | 2.10   |
| 1EAW                                                                                                                                                | 3fp8            | E:I              | 39.5           | 100                          | 40.58                  | 100                    | 0.229          | 2.15   |
| 1EAW                                                                                                                                                | 4dg4            | G:F              | 41.18          | 100                          | 42.21                  | 100                    | 0.060          | 30.11  |
| 1EAW                                                                                                                                                | 4dg4            | D:H              | 41.18          | 100                          | 42.21                  | 100                    | 0.060          | 30.20  |
| 1EAW                                                                                                                                                | 4dg4            | A:C              | 41.18          | 100                          | 42.21                  | 100                    | 0.060          | 30.24  |
| 1EAW                                                                                                                                                | 4dg4            | B:E              | 41.18          | 100                          | 42.21                  | 100                    | 0.060          | 29.94  |
| 1D6R                                                                                                                                                | 1tab            | E:I              | 98.65          | 81.03                        | 99.32                  | 69.17                  | 0.250          | 2.16   |
| 1D6R                                                                                                                                                | 1sbw            | A:I              | 98.65          | 53.57                        | 99.32                  | 34.36                  | 0.241          | 2.67   |
| 1D6R                                                                                                                                                | 3myw            | B:I              | 82.06          | 67.24                        | 82.62                  | 60.7                   | 0.237          | 1.86   |
| 1D6R                                                                                                                                                | 1smf            | E:I              | 98.65          | 59.09                        | 99.32                  | 40.75                  | 0.237          | 2.23   |
| 1D6R                                                                                                                                                | 2g81            | E:I              | 98.65          | 81.03                        | 99.32                  | 68.83                  | 0.237          | 2.57   |
| 1D6R                                                                                                                                                | 3ru4            | T:B              | 98.65          | 81.03                        | 99.32                  | 79.04                  | 0.237          | 2.35   |
| 1D6R                                                                                                                                                | 1tx6            | A:I              | 81.17          | 41.3                         | 81.72                  | 23.98                  | 0.228          | 2.36   |
| 1D6R                                                                                                                                                | 1tx6            | D:J              | 81.17          | 41.3                         | 81.72                  | 23.98                  | 0.207          | 6.92   |

| Case ID | Template PDB ID | Template Rec:Lig | Local Identity |                              | Global                 | Global                 | DockRank Score | L-RMSD |
|---------|-----------------|------------------|----------------|------------------------------|------------------------|------------------------|----------------|--------|
|         |                 |                  | Score AA' (%)  | Local Identity Score BB' (%) | Identity Score AA' (%) | Identity Score BB' (%) |                |        |
| 1D6R    | 1g9i            | E:I              | 98.65          | 63.64                        | 99.32                  | 43.89                  | 0.137          | 21.41  |
| 1D6R    | 3myw            | A:I              | 82.06          | 67.24                        | 82.62                  | 60.7                   | 0.116          | 21.35  |
| 1FQJ    | 1fqk            | C:D              | 91.46          | 95.65                        | 90.19                  | 94.52                  | 0.161          | 4.40   |
| 1FQJ    | 1fqk            | A:B              | 91.46          | 95.65                        | 90.19                  | 94.52                  | 0.161          | 4.38   |
| 1FQJ    | 2ihb            | A:B              | 67.2           | 41.38                        | 66.05                  | 33.73                  | 0.160          | 4.59   |
| 1FQJ    | 2gtp            | B:C              | 69.75          | 42.06                        | 68.56                  | 38.2                   | 0.159          | 4.64   |
| 1FQJ    | 2gtp            | A:D              | 69.75          | 42.06                        | 68.56                  | 38.2                   | 0.159          | 4.60   |
| 1FQJ    | 2ik8            | C:D              | 69.84          | 38.66                        | 68.76                  | 33.73                  | 0.155          | 4.49   |
| 1FQJ    | 2ik8            | A:B              | 69.84          | 38.66                        | 68.76                  | 33.73                  | 0.152          | 4.62   |
| 1FQJ    | 2ik8            | C:B              | 69.84          | 38.66                        | 68.76                  | 33.73                  | 0.082          | 56.64  |
| 1FQJ    | 2ik8            | A:D              | 69.84          | 38.66                        | 68.76                  | 33.73                  | 0.081          | 56.47  |
| 1FQJ    | 1fqk            | A:D              | 91.46          | 95.65                        | 90.19                  | 94.52                  | 0.069          | 61.66  |
| 1GPW    | 2wjz            | A:B              | 99.6           | 99                           | 99.6                   | 98.75                  | 0.170          | 2.17   |
| 1GPW    | 2wjz            | C:D              | 99.6           | 99                           | 99.6                   | 98.75                  | 0.167          | 1.92   |
| 1GPW    | 2wjz            | E:F              | 99.6           | 99                           | 99.6                   | 98.75                  | 0.167          | 2.34   |
| 1GPW    | 2wjz            | C:B              | 99.6           | 99                           | 99.6                   | 98.75                  | 0.066          | 58.33  |
| 1IBR    | 2bku            | A:B              | 98.84          | 40.82                        | 94.22                  | 30.91                  | 0.175          | 4.10   |
| 1IBR    | 2bku            | C:D              | 98.84          | 40.82                        | 94.22                  | 30.91                  | 0.175          | 4.12   |
| 1IBR    | 3ea5            | A:B              | 98.91          | 40.82                        | 91.58                  | 30.91                  | 0.172          | 4.35   |
| 1IBR    | 3ea5            | C:D              | 98.91          | 40.82                        | 91.58                  | 30.91                  | 0.167          | 4.59   |
| 1IBR    | 1wa5            | A:B              | 99.42          | 24.73                        | 94.5                   | 9.36                   | 0.065          | 53.47  |
| 1SBB    | 1l0x            | C:D              | 99.58          | 50                           | 99.79                  | 51.38                  | 0.119          | 2.75   |
| 1SBB    | 1l0x            | A:B              | 99.58          | 50                           | 99.79                  | 51.38                  | 0.119          | 2.46   |
| 1SBB    | 1l0y            | C:D              | 99.58          | 50                           | 99.37                  | 51.38                  | 0.119          | 2.66   |
| 1SBB    | 1l0y            | A:B              | 99.58          | 50                           | 99.37                  | 51.38                  | 0.119          | 2.65   |
| 1SBB    | 1jck            | C:D              | 99.58          | 65.42                        | 99.79                  | 65.69                  | 0.118          | 4.48   |
| 1SBB    | 1jck            | A:B              | 99.58          | 65.42                        | 99.79                  | 65.69                  | 0.118          | 4.48   |
| 1SBB    | 1l0y            | A:D              | 99.58          | 50                           | 99.37                  | 51.38                  | 0.073          | 81.40  |
| 1SBB    | 1l0x            | A:D              | 99.58          | 50                           | 99.79                  | 51.38                  | 0.072          | 81.35  |
| 1SBB    | 1jck            | C:B              | 99.58          | 65.42                        | 99.79                  | 65.69                  | 0.071          | 81.52  |
| 1SBB    | 1jck            | A:D              | 99.58          | 65.42                        | 99.79                  | 65.69                  | 0.071          | 81.52  |
| 1R0R    | 3qtl            | A:D              | 99.27          | 35.71                        | 99.27                  | 16.47                  | 0.271          | 2.07   |
| 1R0R    | 1yu6            | A:C              | 100            | 31.67                        | 99.82                  | 23.77                  | 0.253          | 3.68   |
| 1R0R    | 1yu6            | B:D              | 100            | 31.67                        | 99.82                  | 23.77                  | 0.235          | 1.89   |
| 1R0R    | 3qtl            | C:D              | 99.27          | 35.71                        | 99.27                  | 16.47                  | 0.061          | 27.90  |
| 1UDI    | 2j8x            | C:D              | 41.92          | 100                          | 41.83                  | 99.4                   | 0.258          | 2.35   |
| 1UDI    | 2j8x            | A:B              | 41.92          | 100                          | 41.83                  | 99.4                   | 0.258          | 2.18   |
| 1UDI    | 1eui            | B:D              | 46.73          | 100                          | 43.86                  | 99.4                   | 0.253          | 2.03   |
| 1UDI    | 1lqm            | A:B              | 46.73          | 100                          | 43.76                  | 99.4                   | 0.253          | 1.98   |
| 1UDI    | 1lqg            | B:D              | 46.73          | 100                          | 43.76                  | 99.4                   | 0.253          | 2.06   |
| 1UDI    | 1eui            | A:C              | 46.73          | 100                          | 43.86                  | 99.4                   | 0.253          | 2.03   |
| 1UDI    | 1ugh            | E:I              | 42.08          | 100                          | 41.25                  | 99.4                   | 0.253          | 2.05   |
| 1UDI    | 1lqg            | A:C              | 46.73          | 100                          | 43.76                  | 99.4                   | 0.253          | 2.03   |
| 1UDI    | 2j8x            | C:B              | 41.92          | 100                          | 41.83                  | 99.4                   | 0.086          | 53.65  |
| 1UDI    | 1lqm            | C:H              | 46.73          | 100                          | 43.76                  | 99.4                   | 0.065          | 39.33  |
| 2HLE    | 2wo2            | A:B              | 44.44          | 98.58                        | 43.24                  | 94.71                  | 0.204          | 9.50   |
| 2HLE    | 1kgy            | A:E              | 44.44          | 99.28                        | 43.72                  | 98.22                  | 0.203          | 9.34   |
| 2HLE    | 1kgy            | C:G              | 44.44          | 99.28                        | 43.72                  | 98.22                  | 0.200          | 9.42   |

| Case ID | Template PDB ID | Template Rec:Lig | Local Identity |                              | Global                 | Global                 | DockRank Score | L-RMSD |
|---------|-----------------|------------------|----------------|------------------------------|------------------------|------------------------|----------------|--------|
|         |                 |                  | Score AA' (%)  | Local Identity Score BB' (%) | Identity Score AA' (%) | Identity Score BB' (%) |                |        |
| 2HLE    | 1kgy            | D:H              | 44.44          | 99.28                        | 43.72                  | 98.22                  | 0.197          | 9.43   |
| 2HLE    | 1kgy            | B:F              | 44.44          | 99.28                        | 43.72                  | 98.22                  | 0.197          | 9.49   |
| 2HLE    | 3gxu            | A:B              | 44.75          | 98.58                        | 45.03                  | 97.89                  | 0.190          | 10.27  |
| 2HLE    | 1kgy            | B:G              | 44.44          | 99.28                        | 43.72                  | 98.22                  | 0.070          | 54.25  |
| 2HLE    | 1kgy            | A:H              | 44.44          | 99.28                        | 43.72                  | 98.22                  | 0.068          | 54.03  |
| 2HLE    | 1kgy            | D:E              | 44.44          | 99.28                        | 43.72                  | 98.22                  | 0.067          | 54.43  |
| 2HLE    | 1kgy            | C:F              | 44.44          | 99.28                        | 43.72                  | 98.22                  | 0.067          | 54.22  |
| 2NZ8    | 1foe            | C:D              | 24.73          | 99.43                        | 26.99                  | 97.25                  | 0.151          | 12.62  |
| 2NZ8    | 1foe            | E:F              | 24.73          | 99.43                        | 26.99                  | 97.25                  | 0.150          | 11.89  |
| 2NZ8    | 1foe            | G:H              | 24.73          | 99.43                        | 26.99                  | 97.25                  | 0.148          | 12.58  |
| 2NZ8    | 1foe            | A:B              | 24.73          | 99.43                        | 26.99                  | 97.25                  | 0.147          | 11.92  |
| 2NZ8    | 1kzg            | C:D              | 39.56          | 71.51                        | 38.2                   | 69.02                  | 0.146          | 3.95   |
| 2NZ8    | 1kz7            | C:D              | 38.61          | 71.51                        | 37.28                  | 69.02                  | 0.146          | 4.00   |
| 2NZ8    | 1kzg            | A:B              | 39.56          | 71.51                        | 38.2                   | 69.02                  | 0.146          | 4.17   |
| 2NZ8    | 1kz7            | A:B              | 38.61          | 71.51                        | 37.28                  | 69.02                  | 0.146          | 4.21   |
| 2NZ8    | 1foe            | A:D              | 24.73          | 99.43                        | 26.99                  | 97.25                  | 0.068          | 67.20  |
| 2NZ8    | 1foe            | E:H              | 24.73          | 99.43                        | 26.99                  | 97.25                  | 0.068          | 67.78  |
| 7CEI    | 3u43            | A:B              | 66.67          | 74.62                        | 64.19                  | 73.22                  | 0.229          | 4.71   |
| 7CEI    | 2wpt            | A:B              | 67.05          | 70                           | 68.21                  | 68.69                  | 0.227          | 7.45   |
| 7CEI    | 3gjn            | A:B              | 60.92          | 99.23                        | 61.27                  | 94.98                  | 0.218          | 3.44   |
| 7CEI    | 3gkl            | D:B              | 62.07          | 99.23                        | 62.43                  | 94.98                  | 0.208          | 4.10   |
| 7CEI    | 3gkl            | C:A              | 62.07          | 99.23                        | 62.43                  | 94.98                  | 0.208          | 4.02   |
| 7CEI    | 3gjn            | D:C              | 60.92          | 99.23                        | 61.27                  | 94.98                  | 0.207          | 3.32   |
| 7CEI    | 3gkl            | C:B              | 62.07          | 99.23                        | 62.43                  | 94.98                  | 0.089          | 39.12  |
| 7CEI    | 3gjn            | D:B              | 60.92          | 99.23                        | 61.27                  | 94.98                  | 0.089          | 38.96  |
| 7CEI    | 3gkl            | D:A              | 62.07          | 99.23                        | 62.43                  | 94.98                  | 0.083          | 38.89  |
| 7CEI    | 3gjn            | A:C              | 60.92          | 99.23                        | 61.27                  | 94.98                  | 0.083          | 38.82  |
| 1Z5Y    | 1vrs            | D:A              | 30             | 99.17                        | 17.01                  | 91.54                  | 0.197          | 1.99   |
| 1Z5Y    | 1vrs            | E:B              | 30             | 99.17                        | 17.01                  | 91.54                  | 0.197          | 1.42   |
| 1Z5Y    | 1vrs            | F:C              | 30             | 99.17                        | 17.01                  | 91.54                  | 0.183          | 2.18   |
| 1Z5Y    | 1vrs            | D:C              | 30             | 99.17                        | 17.01                  | 91.54                  | 0.089          | 58.17  |
| 2B42    | 1t6g            | B:D              | 95.01          | 46.71                        | 97.5                   | 42.28                  | 0.183          | 1.58   |
| 2B42    | 3hd8            | C:D              | 84.92          | 99.46                        | 85.6                   | 99.46                  | 0.183          | 0.84   |
| 2B42    | 1t6g            | A:C              | 95.01          | 46.71                        | 97.5                   | 42.28                  | 0.183          | 1.56   |
| 2B42    | 3hd8            | A:B              | 84.92          | 99.46                        | 85.6                   | 99.46                  | 0.183          | 0.78   |
| 2B42    | 3hd8            | A:D              | 84.92          | 99.46                        | 85.6                   | 99.46                  | 0.070          | 53.70  |
| 2B42    | 3hd8            | C:B              | 84.92          | 99.46                        | 85.6                   | 99.46                  | 0.070          | 53.63  |
| 2I25    | 2i26            | N:L              | 88.29          | 100                          | 83.86                  | 100                    | 0.178          | 2.65   |
| 2I25    | 2i26            | P:Q              | 88.29          | 100                          | 83.86                  | 100                    | 0.169          | 3.29   |
| 2I25    | 2i26            | O:M              | 88.29          | 100                          | 83.86                  | 100                    | 0.166          | 2.98   |
| 2I25    | 1sq2            | N:L              | 65.18          | 100                          | 64.6                   | 100                    | 0.158          | 15.23  |
| 2I25    | 1t6v            | O:M              | 65.18          | 100                          | 64.6                   | 100                    | 0.153          | 15.27  |
| 2I25    | 1t6v            | N:L              | 65.18          | 100                          | 64.6                   | 100                    | 0.150          | 16.76  |
| 2I25    | 1t6v            | N:M              | 65.18          | 100                          | 64.6                   | 100                    | 0.068          | 41.05  |
| 2PCC    | 2bcn            | A:B              | 100            | 99.07                        | 99.49                  | 99.07                  | 0.155          | 1.82   |
| 2PCC    | 1u75            | A:B              | 100            | 63.37                        | 99.49                  | 60.4                   | 0.116          | 6.89   |
| 2PCC    | 2pcb            | A:B              | 100            | 63.37                        | 99.49                  | 60.4                   | 0.110          | 6.85   |
| 2PCC    | 2bcn            | C:B              | 100            | 99.07                        | 99.49                  | 99.07                  | 0.077          | 23.01  |

| Case ID                                                                                           | Template PDB ID | Template Rec:Lig | Local Identity |                              | Global                 | Global                 | DockRank Score | L-RMSD |
|---------------------------------------------------------------------------------------------------|-----------------|------------------|----------------|------------------------------|------------------------|------------------------|----------------|--------|
|                                                                                                   |                 |                  | Score AA' (%)  | Local Identity Score BB' (%) | Identity Score AA' (%) | Identity Score BB' (%) |                |        |
| <b>B. Cases with superimposed models that are all near-native (L-RMSD <math>\leq</math> 10 Å)</b> |                 |                  |                |                              |                        |                        |                |        |
| 1CGI                                                                                              | 1z7k            | A:B              | 43.97          | 51.22                        | 43.69                  | 35.69                  | 0.261          | 2.61   |
| 1CGI                                                                                              | 1hja            | C:I              | 100            | 38.1                         | 69.8                   | 29.98                  | 0.259          | 3.68   |
| 1CGI                                                                                              | 1cho            | F:I              | 100            | 38.1                         | 76.73                  | 28.57                  | 0.257          | 2.74   |
| 1CGI                                                                                              | 1hja            | B:I              | 100            | 38.1                         | 76.73                  | 29.98                  | 0.255          | 2.95   |
| 1CGI                                                                                              | 1an1            | E:I              | 43.97          | 50                           | 43.69                  | 21.78                  | 0.252          | 2.71   |
| 1CGI                                                                                              | 1ldt            | T:L              | 43.97          | 50                           | 43.69                  | 21.78                  | 0.252          | 2.50   |
| 1CGI                                                                                              | 1tgs            | Z:I              | 42.06          | 69.09                        | 41.4                   | 67.86                  | 0.250          | 2.65   |
| 1CGI                                                                                              | 1cho            | G:I              | 100            | 38.1                         | 69.8                   | 28.57                  | 0.247          | 3.27   |
| 1AY7                                                                                              | 1x1u            | A:D              | 33.75          | 98.88                        | 26.34                  | 98.88                  | 0.235          | 2.65   |
| 1AY7                                                                                              | 1x1u            | B:E              | 33.75          | 98.88                        | 26.34                  | 98.88                  | 0.235          | 2.43   |
| 1AY7                                                                                              | 1bgs            | C:G              | 33.75          | 98.88                        | 26.34                  | 98.88                  | 0.231          | 2.54   |
| 1AY7                                                                                              | 1x1u            | C:F              | 33.75          | 98.88                        | 26.34                  | 98.88                  | 0.230          | 2.85   |
| 1AY7                                                                                              | 1bgs            | B:F              | 33.75          | 98.88                        | 26.34                  | 98.88                  | 0.230          | 2.53   |
| 1AY7                                                                                              | 1brs            | A:D              | 33.75          | 98.88                        | 26.34                  | 98.88                  | 0.230          | 2.39   |
| 1AY7                                                                                              | 1brs            | B:E              | 33.75          | 98.88                        | 26.34                  | 98.88                  | 0.229          | 2.54   |
| 1AY7                                                                                              | 1brs            | C:F              | 33.75          | 98.88                        | 26.34                  | 98.88                  | 0.229          | 2.81   |
| 1AY7                                                                                              | 1bgs            | A:E              | 33.75          | 98.88                        | 26.34                  | 98.88                  | 0.229          | 2.24   |
| 1AY7                                                                                              | 1b27            | B:E              | 33.75          | 98.88                        | 26.34                  | 98.33                  | 0.228          | 2.49   |
| 1DFJ                                                                                              | 1z7x            | X:W              | 70.16          | 77.36                        | 68.8                   | 76.77                  | 0.202          | 3.81   |
| 1DFJ                                                                                              | 2q4g            | X:W              | 70.16          | 77.36                        | 68.8                   | 76.77                  | 0.197          | 3.72   |
| 1DFJ                                                                                              | 2q4g            | Z:Y              | 70.16          | 77.36                        | 68.8                   | 76.77                  | 0.196          | 4.15   |
| 1DFJ                                                                                              | 1z7x            | Z:Y              | 70.16          | 77.36                        | 68.8                   | 76.77                  | 0.190          | 4.20   |
| 1ACB                                                                                              | 4b2a            | A:B              | 40.95          | 98.48                        | 40.69                  | 95.67                  | 0.243          | 2.40   |
| 1ACB                                                                                              | 4b2b            | A:B              | 40.52          | 98.57                        | 40.26                  | 97.88                  | 0.235          | 2.48   |
| 1ACB                                                                                              | 4b2c            | A:B              | 40.95          | 98.57                        | 40.69                  | 97.88                  | 0.235          | 2.64   |
| 1ACB                                                                                              | 4b1t            | A:B              | 41.38          | 98.57                        | 41.12                  | 98.57                  | 0.235          | 2.69   |
| 1ACB                                                                                              | 4b2c            | C:D              | 40.95          | 98.57                        | 40.69                  | 97.88                  | 0.226          | 2.38   |
| 1ACB                                                                                              | 4b2a            | C:D              | 40.95          | 98.48                        | 40.69                  | 95.67                  | 0.219          | 1.96   |
| 1ACB                                                                                              | 4b2b            | C:D              | 40.52          | 98.57                        | 40.26                  | 97.88                  | 0.219          | 2.34   |
| 1ACB                                                                                              | 4b1t            | C:D              | 41.38          | 98.57                        | 41.12                  | 98.57                  | 0.219          | 2.35   |
| 1BKD                                                                                              | 3cf6            | E:R              | 25.81          | 57.49                        | 12.96                  | 57.66                  | 0.203          | 5.29   |
| 1EFN                                                                                              | 1avz            | B:C              | 76.15          | 100                          | 82.78                  | 100                    | 0.222          | 4.49   |
| 1GLA                                                                                              | 1glb            | G:F              | 99.8           | 100                          | 99.4                   | 94.64                  | 0.132          | 1.71   |
| 1GLA                                                                                              | 1gld            | G:F              | 99.8           | 100                          | 99.4                   | 94.64                  | 0.132          | 1.76   |
| 1GLA                                                                                              | 1glc            | G:F              | 99.8           | 100                          | 99.4                   | 94.64                  | 0.131          | 1.75   |
| 1GLA                                                                                              | 1gle            | G:F              | 99.8           | 100                          | 99.4                   | 94.64                  | 0.131          | 1.74   |
| 1GRN                                                                                              | 2ngr            | A:B              | 99.47          | 94.3                         | 99.21                  | 87.04                  | 0.141          | 4.97   |
| 1GRN                                                                                              | 1tx4            | B:A              | 54.91          | 94.44                        | 51.83                  | 96.69                  | 0.140          | 4.95   |
| 1GRN                                                                                              | 1ow3            | B:A              | 52.69          | 94.82                        | 51.18                  | 86.22                  | 0.138          | 4.90   |
| 1T6B                                                                                              | 1tzn            | C:c              | 92.7           | 100                          | 85.52                  | 100                    | 0.153          | 2.94   |
| 1T6B                                                                                              | 1tzn            | L:l              | 92.7           | 100                          | 85.52                  | 100                    | 0.153          | 2.94   |
| 1T6B                                                                                              | 1tzn            | B:b              | 92.7           | 100                          | 85.52                  | 100                    | 0.153          | 2.92   |
| 1T6B                                                                                              | 1tzn            | J:j              | 92.7           | 100                          | 85.52                  | 100                    | 0.153          | 2.92   |
| 1T6B                                                                                              | 1tzn            | E:e              | 92.7           | 100                          | 85.52                  | 100                    | 0.153          | 2.92   |
| 1T6B                                                                                              | 1tzn            | F:f              | 92.7           | 100                          | 85.52                  | 100                    | 0.153          | 2.94   |

| Case ID | Template PDB ID | Template Rec:Lig | Local Identity |                              | Global                 | Global                 | DockRank Score | L-RMSD |
|---------|-----------------|------------------|----------------|------------------------------|------------------------|------------------------|----------------|--------|
|         |                 |                  | Score AA' (%)  | Local Identity Score BB' (%) | Identity Score AA' (%) | Identity Score BB' (%) |                |        |
| 1T6B    | 1tzn            | I:i              | 92.7           | 100                          | 85.52                  | 100                    | 0.153          | 2.94   |
| 1T6B    | 1tzn            | K:k              | 92.7           | 100                          | 85.52                  | 100                    | 0.153          | 2.92   |
| 1T6B    | 1tzn            | M:m              | 92.7           | 100                          | 85.52                  | 100                    | 0.153          | 2.92   |
| 1T6B    | 1tzn            | D:d              | 92.7           | 100                          | 85.52                  | 100                    | 0.153          | 2.92   |
| 1XD3    | 3kw5            | A:B              | 52.73          | 97.18                        | 53.6                   | 95.28                  | 0.201          | 3.75   |
| 1XD3    | 3ifw            | A:B              | 52.73          | 97.18                        | 53.6                   | 95.28                  | 0.201          | 3.62   |
| 1XD3    | 3kvf            | A:B              | 52.27          | 97.18                        | 53.13                  | 95.28                  | 0.192          | 3.75   |
| 1YVB    | 3ima            | A:B              | 36.44          | 33.87                        | 36.35                  | 21.26                  | 0.215          | 3.68   |
| 1YVB    | 3ima            | C:D              | 36.44          | 33.87                        | 36.35                  | 21.26                  | 0.213          | 3.52   |
| 1Z0K    | 1z0j            | A:B              | 40.37          | 57.58                        | 37.58                  | 36.76                  | 0.265          | 2.50   |
| 2HRK    | 2hsm            | A:B              | 100            | 100                          | 93.48                  | 92.21                  | 0.185          | 1.98   |
| 2SNI    | 1y3d            | E:I              | 99.63          | 92.19                        | 96.95                  | 91.48                  | 0.208          | 1.62   |
| 2SNI    | 1mee            | A:I              | 85.82          | 37.1                         | 85.98                  | 35.66                  | 0.203          | 4.64   |
| 2SNI    | 1y4d            | E:I              | 99.63          | 90.62                        | 96.95                  | 89.92                  | 0.200          | 2.37   |
| 2SNI    | 1y4a            | E:I              | 99.63          | 90.62                        | 96.95                  | 89.92                  | 0.198          | 3.43   |
| 2SNI    | 1sib            | E:I              | 99.64          | 35.48                        | 99.82                  | 32.63                  | 0.198          | 3.91   |
| 2SNI    | 1cse            | E:I              | 69.45          | 37.1                         | 69.7                   | 34.12                  | 0.198          | 4.50   |
| 2SNI    | 1sbn            | E:I              | 99.64          | 37.1                         | 99.82                  | 34.12                  | 0.196          | 3.83   |
| 2SNI    | 2sec            | E:I              | 69.45          | 37.1                         | 69.7                   | 34.12                  | 0.190          | 4.52   |
| 1HE1    | 1g4u            | S:R              | 26.98          | 100                          | 17.41                  | 98.09                  | 0.155          | 5.57   |
| 1IRA    | 4dep            | B:A              | 100            | 29.93                        | 98.29                  | 29.09                  | 0.246          | 2.78   |
| 1IRA    | 4dep            | E:D              | 100            | 29.93                        | 98.29                  | 29.09                  | 0.243          | 2.37   |
| 1KTZ    | 3kfd            | D:H              | 76.79          | 99.04                        | 76.79                  | 93.45                  | 0.165          | 1.34   |
| 1KTZ    | 3kfd            | B:F              | 76.79          | 99.04                        | 76.79                  | 93.45                  | 0.165          | 1.33   |
| 1KTZ    | 3kfd            | A:E              | 76.79          | 99.04                        | 76.79                  | 93.45                  | 0.160          | 3.83   |
| 1KTZ    | 3kfd            | C:G              | 76.79          | 99.04                        | 76.79                  | 93.45                  | 0.160          | 3.86   |
| 1MAH    | 2x8b            | A:B              | 87.22          | 100                          | 84.58                  | 100                    | 0.250          | 2.59   |
| 1MAH    | 1f8u            | A:B              | 87.22          | 100                          | 84.58                  | 100                    | 0.250          | 2.60   |
| 1MAH    | 1b41            | A:B              | 87.38          | 100                          | 87.87                  | 100                    | 0.250          | 2.66   |
| 1PPE    | 2sta            | E:I              | 64.86          | 96.55                        | 65.15                  | 96.55                  | 0.380          | 1.82   |
| 1PPE    | 1h9i            | E:I              | 81.17          | 66.67                        | 81.72                  | 56.04                  | 0.365          | 1.80   |
| 1PPE    | 2stb            | E:I              | 64.86          | 89.66                        | 65.15                  | 89.66                  | 0.363          | 1.79   |
| 1PPE    | 1h9h            | E:I              | 78.35          | 66.67                        | 80.31                  | 54.72                  | 0.361          | 1.78   |
| 1PPE    | 1f2s            | E:I              | 98.65          | 65.52                        | 99.32                  | 66.69                  | 0.346          | 1.76   |
| 1PPE    | 1mct            | A:I              | 80.27          | 57.14                        | 80.82                  | 56.15                  | 0.345          | 1.80   |
| 1PPE    | 2btc            | E:I              | 98.65          | 89.66                        | 99.32                  | 89.66                  | 0.342          | 1.74   |

### C. Cases with superimposed models that are all incorrect (L-RMSD > 10 Å)

|             |      |     |       |       |       |       |       |       |
|-------------|------|-----|-------|-------|-------|-------|-------|-------|
| <b>1H1V</b> | 1esv | A:S | 99.73 | 44.55 | 98.94 | 22.96 | 0.097 | 54.41 |
| <b>1H1V</b> | 1p8z | A:G | 100   | 44.55 | 99.2  | 21.38 | 0.097 | 54.58 |
| <b>1H1V</b> | 1rgi | A:G | 100   | 33.53 | 99.2  | 24.08 | 0.097 | 53.66 |
| <b>1H1V</b> | 1eqy | A:S | 99.73 | 44.55 | 98.94 | 22.96 | 0.096 | 54.40 |
| <b>1H1V</b> | 1mdu | E:D | 99.73 | 44.55 | 98.94 | 22.96 | 0.096 | 53.82 |
| <b>1H1V</b> | 1t44 | A:G | 100   | 44.55 | 99.6  | 20.03 | 0.096 | 54.47 |
| <b>1H1V</b> | 3cjc | A:G | 100   | 44.55 | 99.2  | 22.96 | 0.096 | 54.12 |

| Case ID | Template PDB ID | Template Rec:Lig | Local Identity |                              | Global                 | Global                 | DockRank Score | L-RMSD |
|---------|-----------------|------------------|----------------|------------------------------|------------------------|------------------------|----------------|--------|
|         |                 |                  | Score AA' (%)  | Local Identity Score BB' (%) | Identity Score AA' (%) | Identity Score BB' (%) |                |        |
| 1H1V    | 3cjb            | A:G              | 100            | 44.55                        | 99.2                   | 22.96                  | 0.096          | 54.39  |
| 1H1V    | 1mdu            | B:A              | 99.73          | 44.55                        | 98.94                  | 22.96                  | 0.096          | 53.99  |
| 1H1V    | 1mdu            | E:A              | 99.73          | 44.55                        | 98.94                  | 22.96                  | 0.063          | 45.94  |
| 2OT3    | 2efe            | C:D              | 37.22          | 39.38                        | 26.22                  | 36.5                   | 0.179          | 17.16  |
| 2OT3    | 2efd            | C:D              | 37.22          | 39.38                        | 26.22                  | 36.5                   | 0.176          | 16.87  |
| 2OT3    | 2efd            | A:B              | 37.22          | 39.38                        | 26.22                  | 36.5                   | 0.173          | 16.94  |
| 2OT3    | 2efc            | A:B              | 37.22          | 39.38                        | 26.22                  | 36.5                   | 0.173          | 17.11  |
| 2OT3    | 2efc            | C:D              | 37.22          | 39.38                        | 26.22                  | 36.5                   | 0.173          | 17.20  |
| 2OT3    | 2efe            | A:B              | 37.22          | 39.38                        | 26.22                  | 36.5                   | 0.173          | 17.11  |
| 2OT3    | 2efh            | C:D              | 36.67          | 39.38                        | 25.83                  | 36.5                   | 0.164          | 17.30  |
| 2OT3    | 2efh            | A:B              | 36.67          | 39.38                        | 25.83                  | 36.5                   | 0.164          | 17.23  |
| 2OT3    | 2efc            | C:B              | 37.22          | 39.38                        | 26.22                  | 36.5                   | 0.066          | 47.70  |
| 2OT3    | 2efe            | C:B              | 37.22          | 39.38                        | 26.22                  | 36.5                   | 0.066          | 47.82  |
| 2CFH    | 2j3t            | A:B              | 98.11          | 52.53                        | 91.91                  | 55.12                  | 0.214          | 13.39  |
| 2CFH    | 2c0j            | A:B              | 98.09          | 52.53                        | 96.25                  | 54.96                  | 0.214          | 13.65  |
| 1ZHI    | 1zbx            | A:B              | 93.46          | 88.28                        | 94.93                  | 89.92                  | 0.159          | 11.48  |
| 2AJF    | 3sci            | B:F              | 100            | 98.91                        | 99.5                   | 89.15                  | 0.149          | 12.89  |
| 2AJF    | 3sci            | A:E              | 100            | 98.91                        | 99.5                   | 89.15                  | 0.144          | 12.27  |
| 1EWY    | 1krh            | B:A              | 25             | 32.22                        | 21.9                   | 19.08                  | 0.000          | 57.37  |
| 1EWY    | 1krh            | A:B              | 25             | 32.22                        | 21.9                   | 19.08                  | 0.000          | 60.09  |
| 1GCQ    | 1g83            | B:A              | 32.76          | 46.15                        | 10.26                  | 12.59                  | 0.071          | 53.71  |
| 1GCQ    | 1g83            | A:B              | 32.76          | 46.15                        | 10.26                  | 12.59                  | 0.065          | 48.07  |
| 1GHQ    | 3oxu            | A:E              | 100            | 27.74                        | 95.72                  | 29.35                  | 0.116          | 29.92  |
| 1GHQ    | 3oxu            | B:F              | 100            | 27.74                        | 95.72                  | 29.35                  | 0.115          | 29.88  |
| 1GHQ    | 3rj3            | C:D              | 100            | 27.74                        | 95.72                  | 29.35                  | 0.109          | 30.00  |
| 1GHQ    | 3oxu            | C:D              | 100            | 27.74                        | 95.72                  | 29.35                  | 0.109          | 29.82  |
| 1GHQ    | 2xqw            | A:C              | 100            | 26.67                        | 100                    | 27.38                  | 0.109          | 30.27  |
| 1NW9    | 1i4o            | B:D              | 32.08          | 100                          | 32.75                  | 10.26                  | 0.091          | 50.97  |
| 1NW9    | 1i51            | A:E              | 36.99          | 40.24                        | 29.4                   | 30.6                   | 0.090          | 50.70  |
| 1NW9    | 1i4o            | A:C              | 32.08          | 100                          | 32.75                  | 10.26                  | 0.088          | 50.57  |
| 1NW9    | 1i51            | B:E              | 35.16          | 40.24                        | 21.85                  | 30.6                   | 0.087          | 50.37  |
| 1NW9    | 1i51            | C:F              | 36.99          | 40.24                        | 29.4                   | 30.6                   | 0.087          | 32.61  |
| 1NW9    | 1i51            | D:F              | 35.16          | 40.24                        | 21.85                  | 30.6                   | 0.085          | 32.95  |
| 1NW9    | 1i3o            | C:F              | 39.6           | 40.24                        | 29.05                  | 30.13                  | 0.082          | 55.41  |
| 1NW9    | 1i3o            | A:E              | 39.6           | 40.24                        | 29.05                  | 30.13                  | 0.077          | 55.50  |
| 2UUY    | 1toc            | B:R              | 35.04          | 31.43                        | 37.14                  | 14.58                  | 0.000          | 39.00  |
| 2UUY    | 1toc            | F:T              | 35.04          | 31.43                        | 37.14                  | 14.58                  | 0.000          | 39.39  |
| 2UUY    | 1toc            | H:U              | 35.04          | 31.43                        | 37.14                  | 14.58                  | 0.000          | 19.99  |
| 2UUY    | 1toc            | D:S              | 35.04          | 31.43                        | 37.14                  | 14.58                  | 0.000          | 20.14  |
| 2UUY    | 1toc            | H:S              | 35.04          | 31.43                        | 37.14                  | 14.58                  | 0.000          | 40.05  |
| 2UUY    | 1toc            | D:T              | 35.04          | 31.43                        | 37.14                  | 14.58                  | 0.000          | 90.68  |
| 1QA9    | 1a6p            | A:B              | 44.79          | 26.92                        | 34.88                  | 17.31                  | 0.166          | 26.01  |
| 1QA9    | 1a64            | A:B              | 44.79          | 26.92                        | 34.17                  | 16.96                  | 0.159          | 25.73  |
| 1QA9    | 1a6p            | B:A              | 44.79          | 26.92                        | 34.88                  | 17.31                  | 0.159          | 26.00  |
| 1QA9    | 1a7b            | D:C              | 44.79          | 26.92                        | 34.17                  | 16.96                  | 0.148          | 27.46  |
| 1QA9    | 1a7b            | A:B              | 44.79          | 26.92                        | 34.17                  | 16.96                  | 0.143          | 26.66  |

| Case ID | Template PDB ID | Template Rec:Lig | Local Identity |                              | Global                 | Global                 | DockRank Score | L-RMSD |
|---------|-----------------|------------------|----------------|------------------------------|------------------------|------------------------|----------------|--------|
|         |                 |                  | Score AA' (%)  | Local Identity Score BB' (%) | Identity Score AA' (%) | Identity Score BB' (%) |                |        |
| 1QA9    | 1a7b            | C:A              | 44.79          | 26.92                        | 34.17                  | 16.96                  | 0.125          | 11.32  |
| 1QA9    | 1a7b            | B:D              | 44.79          | 26.92                        | 34.17                  | 16.96                  | 0.108          | 11.20  |
| 1QA9    | 1a7b            | B:C              | 44.79          | 26.92                        | 34.17                  | 16.96                  | 0.039          | 36.22  |
| 1QA9    | 1a7b            | D:A              | 44.79          | 26.92                        | 34.17                  | 16.96                  | 0.039          | 36.24  |
| 1QA9    | 1a7b            | C:B              | 44.79          | 26.92                        | 34.17                  | 16.96                  | 0.038          | 36.76  |
| 1GHQ    | 1w2s            | A:B              | 100            | 98.44                        | 97.88                  | 92.83                  | 0.098          | 49.87  |
| 1GHQ    | 3rj3            | C:E              | 100            | 27.74                        | 95.72                  | 29.35                  | 0.076          | 36.57  |
| 1GHQ    | 3oxu            | B:D              | 100            | 27.74                        | 95.72                  | 29.35                  | 0.076          | 63.94  |
| 1GHQ    | 2xqw            | B:C              | 100            | 26.67                        | 100                    | 27.38                  | 0.076          | 75.28  |
| 1GHQ    | 3oxu            | A:D              | 100            | 27.74                        | 95.72                  | 29.35                  | 0.076          | 79.90  |
| 1OPH    | 2d26            | A:C              | 98.21          | 37.6                         | 90.44                  | 39.36                  | 0.097          | 93.95  |
| 1KXQ    | 1kxt            | A:B              | 99.4           | 64.84                        | 99.4                   | 67.26                  | 0.173          | 47.03  |
| 1KXQ    | 1kxt            | C:D              | 99.4           | 64.84                        | 99.4                   | 67.26                  | 0.172          | 47.24  |
| 1KXQ    | 1kxt            | E:F              | 99.4           | 64.84                        | 99.4                   | 67.26                  | 0.172          | 47.81  |
| 1KXQ    | 1kxv            | B:D              | 99.4           | 58.54                        | 99.4                   | 59.76                  | 0.162          | 51.77  |
| 1KXQ    | 1kxv            | A:C              | 99.4           | 58.54                        | 99.4                   | 59.76                  | 0.157          | 52.49  |
| 1KXQ    | 1kxv            | B:C              | 99.4           | 58.54                        | 99.4                   | 59.76                  | 0.069          | 41.10  |
