# Supplementary material
Source: PubMed Central journal article supplement (PMC4417613)
Supplement: NIHMS667557-supplement-Supplementary_Table_5.pdf [file NIHMS667557-supplement-Supplementary_Table_5.pdf]

**Table S5. Interface predictions of PS-HomPPI on cases that have more than two chains but only a subset of chains have templates.** The query chain pairs that do not have templates are marked with dashes, because PS-HomPPI cannot make predictions on them.

|           | Case ID  | Query Chain | Partner Chain | Confidence Zone  | # Actual Interface |       |       |             |             |
|-----------|----------|-------------|---------------|------------------|--------------------|-------|-------|-------------|-------------|
|           |          |             |               |                  | Residues           | CC    | F1    | Sensitivity | Specificity |
| Group I   | 1GP2     | B           | A             | Safe             | 35                 | 0.91  | 0.92  | 1.00        | 0.85        |
|           |          | A           | B             | Safe             | 19                 | 0.95  | 0.95  | 1.00        | 0.90        |
|           |          | A           | G             | No homolog found | 0                  | -     | -     | -           | -           |
|           |          | G           | A             | No homolog found | 0                  | -     | -     | -           | -           |
|           | 1K5D     | A           | C             | Safe             | 31                 | 0.95  | 0.95  | 1.00        | 0.91        |
|           |          | B           | C             | No homolog found | 0                  | -     | -     | -           | -           |
|           |          | C           | B             | No homolog found | 0                  | -     | -     | -           | -           |
|           | 1JMO     | H           | A             | Safe             | 55                 | 0.61  | 0.67  | 0.56        | 0.82        |
|           |          | A           | H             | Safe             | 26                 | 0.51  | 0.52  | 0.42        | 0.69        |
|           |          | A           | L             | No homolog found | 0                  | -     | -     | -           | -           |
|           |          | L           | A             | No homolog found | 0                  | -     | -     | -           | -           |
|           | 1F51     | A           | E             | Safe             | 17                 | 0.08  | 0.18  | 0.18        | 0.18        |
|           |          | E           | A             | Safe             | 24                 | 0.89  | 0.91  | 0.83        | 1.00        |
|           |          | B           | E             | No homolog found | 8                  | -     | -     | -           | -           |
|           |          | E           | B             | No homolog found | 5                  | -     | -     | -           | -           |
|           | Group II | 1E6J        | P             | H                | Twilight 1         | 12    | -0.18 | 0.06        | 0.08        |
| H         |          |             | P             | Twilight 1       | 17                 | 0.27  | 0.33  | 0.41        | 0.28        |
| P         |          |             | L             | No homolog found | 5                  | -     | -     | -           | -           |
| L         |          |             | P             | No homolog found | 4                  | -     | -     | -           | -           |
| 2FD6      |          | L           | U             | Twilight 1       | 6                  | 0.12  | 0.12  | 0.50        | 0.07        |
|           |          | U           | L             | Twilight 1       | 8                  | -0.04 | 0.00  | 0.00        | 0.00        |
|           |          | U           | H             | No homolog found | 15                 | -     | -     | -           | -           |
|           |          | H           | U             | No homolog found | 9                  | -     | -     | -           | -           |
| Group III | 2HMI     | A           | D             | Safe             | 0                  | 0.32  | 0.00  | 0.00        | 0.00        |
|           |          | A           | C             | Safe             | 0                  | 0.33  | 0.00  | 0.00        | 0.00        |
|           |          | D           | A             | Safe             | 0                  | 0.28  | 0.00  | 0.00        | 0.00        |
|           |          | C           | A             | Safe             | 0                  | 0.31  | 0.00  | 0.00        | 0.00        |
|           |          | B           | D             | No homolog found | 13                 | -     | -     | -           | -           |
|           |          | C           | B             | No homolog found | 6                  | -     | -     | -           | -           |
|           |          | B           | C             | No homolog found | 5                  | -     | -     | -           | -           |
|           |          | D           | B             | No homolog found | 15                 | -     | -     | -           | -           |
