# Supplementary material
Source: PubMed Central journal article supplement (PMC4417613)
Supplement: NIHMS667557-supplement-Supplementary_Text_1.pdf [file NIHMS667557-supplement-Supplementary_Text_1.pdf]

## **Text S1. PS-HomPPI (Partner-Specific Sequence Homology based Protein-Protein Interface Prediction)**

Our interface predictor PS-HomPPI consists of two major modules:

- **PS-interface conservation analysis:** PS-interface conservation analysis (shown as a PCA biplot in Figure S1) is based on a dataset of transient dimers with experimentally determined interface residues. For each dimer  $A : B$ , sequence homologs  $A' : B'$  with known interfaces are retrieved along with sequence alignment measures (e.g., E-value returned by BLASTP). An interface conservation score (IC-score) is calculated based on the similarity of the interfaces of query pair  $A : B$  and those of  $A' : B'$ . The higher the IC-score, the more similar the interfaces of query pair and its homo-interolog. Based on the IC-scores, three interface conservation zones are identified: the Safe Zone, where the interfaces are most conserved among homo-interologs; the Twilight Zone, which denotes the area of medium interface conservation; and the Dark Zone, which denotes the area of lowest interface conservation. A regression model of the relation between IC-score and the sequence alignment measures is constructed. This model is used to estimate the IC score of a homo-interolog during the prediction phase.
- **PS-interface prediction:** To predict the interface residues between a pair of proteins  $A : B$ , the homo-interologs of  $A : B$  with known interfaces are retrieved. For each homo-interolog  $A' : B'$  of  $A : B$ , sequence alignment measures between  $A$  and  $A'$ , and between  $B$  and  $B'$  are obtained using BLASTP. The regression model is used to estimate the IC-score for each homo-interolog of  $A : B$ . If at least one homo-interolog in the Safe Zone is found, PS-HomPPI uses the Safe Zone homo-interolog(s) to infer the interfaces of the query protein. Otherwise, the search is repeated for homo-interologs in the Twilight and Dark Zones. The top  $K$  ( $K = 10$  by default.  $K < 10$  if there are no enough homo-interologs available) homo-interologs within a single zone are used for interface inference. The zone of homo-interologs used in predictions provides the prediction confidence level.

The default parameters of PS-HomPPI were used in this study. For detailed parameter settings, please refer to Xue et al. 2011 [42].
