# Supplementary material
Source: PubMed Central journal article supplement (PMC4417613)

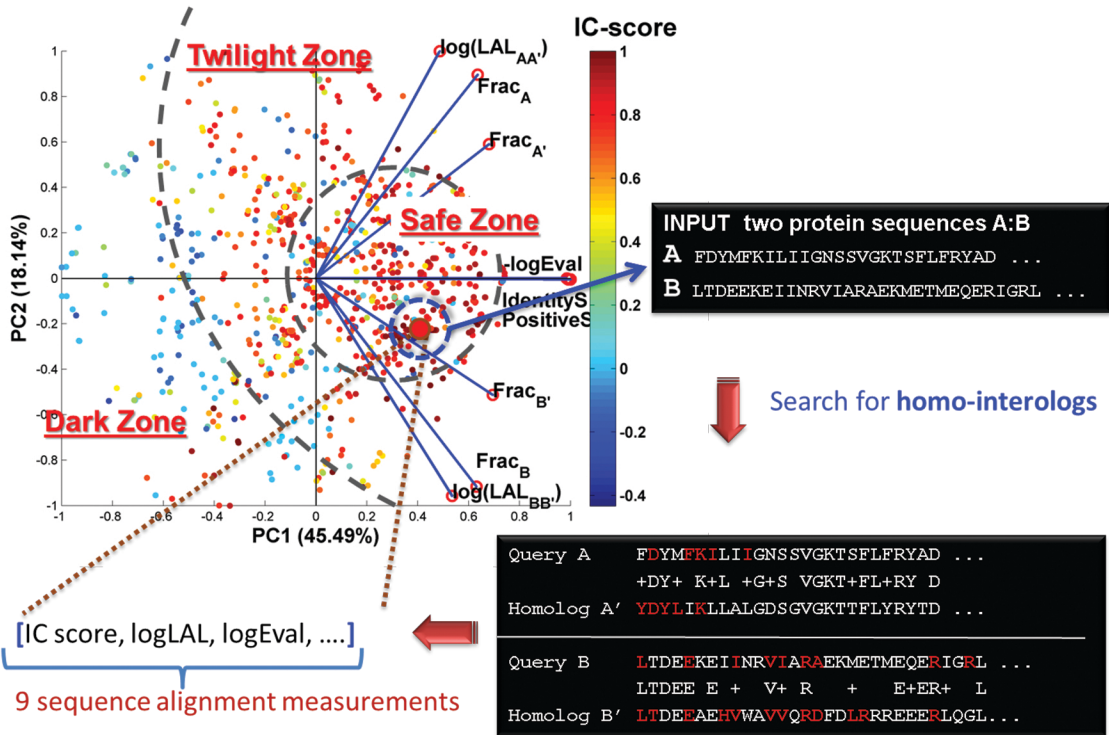

Supplement: NIHMS667557-supplement-Supplementary_Figure_1.pdf [file NIHMS667557-supplement-Supplementary_Figure_1.pdf]
